# Supplementary material for: Glycan Biosynthesis Ability of Gut Microbiota Increased in Primary Hypertension Patients Taking Antihypertension Medications and Potentially Promoted by Macrophage-Adenosine Monophosphate-Activated Protein Kinase
Source: Front Microbiol. 2021 Nov 4;12:719599. doi: 10.3389/fmicb.2021.719599 (PMC8600050; doi:10.3389/fmicb.2021.719599)
Supplement: Supplementary file 2 [file Data_Sheet_1.pdf]

## *Supplementary Material*

### **1 Supplementary Data Information**

This file includes:

Supplementary information of meta-analysis on medications' effects on AMPK pathway.

Supplementary Figure legend 1 to 3

Supplementary Table 2.

Supplementary table legend 1 to 16.

Supplementary references

### **2 Supplementary Information of Meta-analysis on Medications' Effects on AMPK Pathway**

From literature study, we found that half of the drugs (36 in 72) in the medication history of our investigated patients were reported to regulate AMP-activated protein kinase (AMPK) pathway in different tissues (Supplementary Table 2), and 34 of the 36 drugs were reported to activate AMPK pathway. Moreover, 26 of the 30 investigated patients took at least one kind of the 34 AMPK-activated drugs during the investigation and/ or right before coming to our hospital, and the rest 4 patients took drugs having dual-regulation effects on AMPK (Supplementary Table 1). On the other side, hypertension could activate macrophage to induce systemic inflammation and cause organs damage (De Ciuceis et al., 2005; Tieu et al., 2009), while macrophage along with other immune cells could regulate gut microbiota colonization and composition (Earley et al., 2018; Mao et al., 2018), and AMPK pathway is essential for regulating macrophage phenotype and functions (Sag et al., 2008). Based on these cognitions, we hypothesized that, the macrophage-AMPK mechanism might be the common regulation mechanism of anti-hypertension medications to mediate gut microbiota changes in our investigated patients.

### **3 Supplementary Figure Legends**

#### **Supplementary Figure 1. $\alpha$ -diversity analysis by Simpson and Evenness index in human cohort**

$\alpha$ -diversity analysis by Simpson and Evenness index based on genus (A), species (B), and orthologs (C) profile. Ctrl, healthy control group. HBP, primary hypertension patient group who took anti-hypertension medications before testing metagenomics. Gene level, i.e., ortholog level.

## Supplementary Figure 2. Abundant differences of several hub genes related to glycan biosynthesis

The abundances of 5 glycan-biosynthesis related hub genes, which were identified in cohort fecal DNA, were shown here. Ctrl, healthy control group. HBP, hypertension patient group.  $P=0.054$  was evaluated by two-tailed Mann-Whitney U-test.

## Supplementary Figure 3. $\alpha$ -diversity analysis by Simpson and Evenness index in experimental mice

$\alpha$ -diversity analysis by Simpson and Evenness index based on genus (A), species (B), and orthologs (C) profile. AW-A, wild-type mice ( $AMPK\alpha1^{fl/fl}/WT$ , already received tamoxifen injection), which did not receive angiotensin II treatment. AW-B, wild-type mice received angiotensin II stimulation for 7 days. AK-A, AMPK-knockout mice ( $AMPK\alpha1^{fl/fl}/Csf1r-MerCre$ , already received tamoxifen injection), which did not receive angiotensin II treatment. AK-B, AMPK-knockout mice received angiotensin II stimulation for 7 days. Gene level, i.e., ortholog level. \*,  $p < 0.05$  by one-tailed Mann-Whitney U-test.  $P=0.06$  was also evaluated by one-tailed Mann-Whitney U-test.

## 4 Supplementary Tables

### Supplementary Table 1. Basic information of study cohort

The basic physiological index, medical history and medication history of the 8 healthy people and 30 primary hypertension patients are shown in the table. For primer hypertension patients, the BMI was not recorded in the medical history system. Blood biochemical index was labeled red or blue if the value was higher or lower than the normal range. Drugs with red color are reported to activate AMPK pathway, while drugs with blue color are reported to inhibit AMPK pathway, and drugs with green color are reported to be able to both activate and inhibit AMPK pathway. Patients labeled with yellow color are taking AMPK-activated drugs during the current medical treatment and before fecal sample collection, or took AMPK-activated drugs before the current medical treatment, or both. And patients labeled with orange color are taking AMPK-dual-function drugs without AMPK-activated drugs during the current medical treatment and before fecal sample collection, or took such medication before the current treatment, or both. Control is defined as  $SBP \leq 125$  mmHg and  $DBP \leq 80$  mmHg for untreated subjects. Hypertension is defined as current  $SBP \geq 130$  mmHg or  $DBP \geq 90$  mmHg patients with or without antihypertension treatments. Ctrl, healthy control group; HBP, hypertension patient group; SBP, systolic blood pressure; DBP, diastolic blood pressure; BMI, body mass index; FBG, fasting blood glucose; TC, total cholesterol; TG, triglyceride; HDL, high density lipoprotein; LDL, low density lipoprotein. For HBP patients, their blood pressure control effects were based on the BP values when discharged from hospital, according to the standard in “2018 Chinese Guidelines for Prevention and Treatment of Hypertension”.

**Supplementary Table 2. Regulation effects of drugs in the cohort medication history on AMPK pathway**

| <b>Drug Code</b> | <b>Drug Name</b>                                           | <b>Indication Symptom</b> | <b>Regulation effect on AMPK pathway, and tissue/cell type</b> | <b>Reference</b>         |
|------------------|------------------------------------------------------------|---------------------------|----------------------------------------------------------------|--------------------------|
| #01              | Micardis, Telmisartan                                      | Hypertension              | Activate<br>Vascular smooth muscle cells                       | (Hwang and Cho, 2020)    |
| #02              | Losartan Potassium                                         | Hypertension              | Activate<br>H9c2 rat cardiomyocytes                            | (Hernandez et al., 2014) |
| #03              | Hyzaar; Losartan potassium and hydrochlorothiazide tablets | Hypertension              | Activate<br>H9c2 rat cardiomyocytes                            | (Hernandez et al., 2014) |
| #04              | Salcuba trivalsartan sodium                                | Hypertension              | No report                                                      | /                        |
| #05              | Plendil; Felodipine                                        | Hypertension              | No report                                                      | /                        |
| #06              | Benidipine                                                 | Hypertension              | Activate<br>Rat kidney                                         | (Ishizaka et al., 2010)  |
| #07              | Benidipine hydrochloride                                   | Hypertension              | Activate<br>Rat kidney                                         | (Ishizaka et al., 2010)  |
| #08              | Lercanidipine                                              | Hypertension              | No report                                                      | /                        |
| #09              | Lercanidipine hydrochloride                                | Hypertension              | No report                                                      | /                        |

|     |                                            |              |                                                                                                             |                                                                                 |
|-----|--------------------------------------------|--------------|-------------------------------------------------------------------------------------------------------------|---------------------------------------------------------------------------------|
| #10 | Levamlodipine                              | Hypertension | No report                                                                                                   | /                                                                               |
| #11 | Norvasc,<br>Amlodipine besylate<br>tablets | Hypertension | No report                                                                                                   | /                                                                               |
| #12 | Allisartan isoproxil                       | Hypertension | No report                                                                                                   | /                                                                               |
| #13 | Olmesartan                                 | Hypertension | Not regulate<br>Mouse glomerulus                                                                            | (Gu et al.,<br>2016)                                                            |
| #14 | Candesartan cilexetil                      | Hypertension | Activate<br><br>Rat hypothalamic<br>tissue                                                                  | (Marques<br>et al.,<br>2012)                                                    |
| #15 | Adalat, Nifedipine                         | Hypertension | Both activate and<br>inhibit<br><br>Activate: vascular<br>smooth muscle<br>cells<br><br>Inhibit: Rat kidney | Active:<br>(Sung and<br>Choi,<br>2012)<br><br>Inhibit:<br>(Lin et al.,<br>2020) |
| #16 | Nifedipine<br>sustained-release<br>tablets | Hypertension | Both activate and<br>inhibit<br><br>Activate: vascular<br>smooth muscle<br>cells<br><br>Inhibit: Rat kidney | Active:<br>(Sung and<br>Choi,<br>2012)<br><br>Inhibit:<br>(Lin et al.,<br>2020) |
| #17 | Diovan, Valsartan<br>capsules              | Hypertension | Activate<br><br>THP-1 cells,<br>monocyte-like cell<br>line                                                  | (Ha et al.,<br>2014)                                                            |
| #18 | Co-Diovan,<br>Valsartan and                | Hypertension | Activate                                                                                                    | (Ha et al.,<br>2014)                                                            |

|     |                                            |              |                                                                |                      |
|-----|--------------------------------------------|--------------|----------------------------------------------------------------|----------------------|
|     | hydrochlorothiazide tablets                |              | THP-1 cells, monocyte-like cell line                           |                      |
| #19 | Valsartan amlodipine tablets               | Hypertension | Activate<br>THP-1 cells, monocyte-like cell line               | (Ha et al., 2014)    |
| #20 | Irbesartan                                 | Hypertension | Activate<br>Human and mouse hepatocytes                        | (He et al., 2019)    |
| #21 | Aprovel, Irbesartan                        | Hypertension | Activate<br>Human and mouse hepatocytes                        | (He et al., 2019)    |
| #22 | Irbesartan and hydrochlorothiazide tablets | Hypertension | Activate<br>Human and mouse hepatocytes                        | (He et al., 2019)    |
| #23 | Terazosin                                  | Hypertension | No report                                                      | /                    |
| #24 | Terazosin hydrochloride tablets            | Hypertension | No report                                                      | /                    |
| #25 | Furosemide                                 | Hypertension | Inhibit<br>Human liver (HepG2) and primary kidney (HRCE) cells | (Knake et al., 2014) |
| #26 | Acertil, Perindopril tablets               | Hypertension | No report                                                      | /                    |
| #27 | Natrilix tablets, Indapamide               | Hypertension | No report                                                      | /                    |

|     |                                                     |              |                                                     |                                       |
|-----|-----------------------------------------------------|--------------|-----------------------------------------------------|---------------------------------------|
| #28 | Spironolactone                                      | Hypertension | Activate<br>Dog ventricular tissues                 | (Li et al., 2019)                     |
| #29 | Reserpine,<br>Dihydralazine,<br>Hydrochlorothiazide | Hypertension | No report                                           | /                                     |
| #30 | Compound<br>hypotensive tTablets                    | Hypertension | No report                                           | /                                     |
| #31 | Herbesser, Diltiazem<br>hydrochloride               | Hypertension | Inhibit<br>Neuronal<br>differentiated PC12<br>cells | (Lee et al., 2016)                    |
| #32 | Bisoprolol<br>hemifumarate                          | Hypertension | No report                                           | /                                     |
| #33 | Labetalol                                           | Hypertension | No report                                           | /                                     |
| #34 | Arotinolol                                          | Hypertension | No report                                           | /                                     |
| #35 | Betaloc, Metoprolol                                 | Hypertension | Activate<br>Dog cardiac tissue                      | (Sun et al., 2017)                    |
| #36 | Concor, Bisoorolol                                  | Hypertension | No report                                           | /                                     |
| #37 | Fosinopril                                          | Hypertension | No report                                           | /                                     |
| #38 | Enalapril                                           | Hypertension | Activate<br>Mouse cardiac<br>tissue                 | (Suarez-<br>Martinez et<br>al., 2014) |
| #39 | Benazepril                                          | Hypertension | No report                                           | /                                     |
| #40 | Indapamide tablets                                  | Hypertension | No report                                           | /                                     |

|     |                                                    |                                |                                                   |                      |
|-----|----------------------------------------------------|--------------------------------|---------------------------------------------------|----------------------|
| #41 | Carvedilol                                         | Hypertension                   | Activate<br>Cardiomyocytes                        | (Hu et al., 2019)    |
| #42 | Lacidipine                                         | Hypertension                   | No report                                         | /                    |
| #43 | Verapamil,<br>Verapamil<br>hydrochloride           | Hypertension<br>and arrhythmia | No report                                         | /                    |
| #44 | Potassium chloride<br>sustained-release<br>tablets | Hypertension<br>and arrhythmia | No report                                         | /                    |
| #45 | Basalin, Glargine                                  | Diabetes                       | Activate<br>Rat gastrocnemius<br>muscle           | (Hong et al., 2018)  |
| #46 | Glucobay, Acarbose                                 | Diabetes                       | Activate<br>Rat duodenal<br>mucosal               | (Duca et al., 2015)  |
| #47 | Metformin                                          | Diabetes                       | Activate<br>Rat duodenal<br>mucosal               | (Duca et al., 2015)  |
| #48 | Glucophage,<br>Metformin<br>hydrochloride tablets  | Diabetes                       | Activate<br>Rat duodenal<br>mucosal               | (Duca et al., 2015)  |
| #49 | Sitagliptin phosphate                              | Diabetes                       | Activate<br>Mouse endothelial<br>progenitor cells | (Dai et al., 2018)   |
| #50 | Pitavastatin, Livalo                               | Hyperlipidemia                 | Activate<br>L6 skeletal muscle<br>cells           | (Ohira et al., 2012) |

|     |                                      |                |                                                      |                      |
|-----|--------------------------------------|----------------|------------------------------------------------------|----------------------|
| #51 | Pitastatin calcium tablets           | Hyperlipidemia | Activate<br>L6 skeletal muscle cells                 | (Ohira et al., 2012) |
| #52 | Atorvastatin, Lipitor                | Hyperlipidemia | Activate<br>L6 skeletal muscle cells                 | (Ohira et al., 2012) |
| #53 | Rosuvastatin                         | Hyperlipidemia | Activate<br>SH-SY5Y cells, neuroblastic cell cluster | (Kang et al., 2017)  |
| #54 | Xuezhikang Capsule                   | Hyperlipidemia | No report                                            | /                    |
| #55 | Lipanthyl, Fenofibrate               | Hyperlipidemia | Activate<br>Gastric cancer cells                     | (Chen et al., 2020)  |
| #56 | Ezetimibe                            | Hyperlipidemia | Activate<br>Mice adipocyte tissue                    | (Lee et al., 2020)   |
| #57 | Ethyl polyenoate soft capsules       | Hyperlipidemia | No report                                            | /                    |
| #58 | Aspirin                              | Coagulation    | Activate<br>Hepatocellular carcinoma cells           | (Huang et al., 2018) |
| #59 | Plavix, Clopidogrel hydrogen sulfate | Coagulation    | Inhibit<br>HL-60 cells, leukemic cell line           | (Yang et al., 2016)  |
| #60 | Dabigatran                           | Coagulation    | No report                                            | /                    |

|     |                                                         |                        |                                                     |                      |
|-----|---------------------------------------------------------|------------------------|-----------------------------------------------------|----------------------|
| #61 | Bayaspirin                                              | Coagulation            | Activate<br>Human hepatocellular carcinoma cell     | (Huang et al., 2018) |
| #62 | Warfarin                                                | Coagulation            | No report                                           | /                    |
| #63 | Imdur, Isosorbide mononitrate sustained-release tablets | Coronary heart disease | No report                                           | /                    |
| #64 | Zhenyuan capsule                                        | Coronary heart disease | No report                                           | /                    |
| #65 | Clarityne, Loratadine                                   | Allergic rhinitis      | Not regulate MC3T3-E1 cells, osteoblastic cell line | (Sun et al., 2019)   |
| #66 | Febuxostat                                              | Gout                   | Activate<br>Renal tubular cells                     | (Kim et al., 2020)   |
| #67 | Pantoprazole sodium                                     | Peptic ulcer           | No report                                           | /                    |
| #68 | Rabeprazole sodium                                      | Peptic ulcer           | No report                                           | /                    |
| #69 | Zoloft, Sertraline hydrochloride                        | Depression             | Activate<br>Human umbilical vein endothelial cells  | (Hwang et al., 2020) |
| #70 | Zopiclone                                               | Insomnia               | No report                                           | /                    |
| #71 | Trastal, Piribedil tablets                              | Parkinson              | No report                                           | /                    |
| #72 | Madopar, Levodopa and benserazide                       | Parkinson              | No report                                           | /                    |

Drugs which were reported to activate AMPK are labeled red, and drugs which were reported to inhibit AMPK are labeled blue. Two drugs were reported to both activate and inhibit AMPK pathway in different tissues, and they are labeled green.

### **Supplementary Table 3. Sequencing data production of 38 fecal DNA samples of study cohort**

Raw data is the original data after sequencing. Clean data is the effective data after filtering the raw data. Scaffigs are the continuous sequences within scaffolds, which were generated from clean data by assembly analysis using SOAPdenovo software. Total length is the length of all Scaffigs in each sample. N50 length is the length of a medial Scaffig sequence when its length plus all the lengths of sequences longer than it equals 50% of the total Scaffigs length. Ctrl, healthy control group. HBP, hypertension patient group.

### **Supplementary Table 4. Relative abundance of all identified bacterial taxonomies in study cohort fecal DNA**

The abundance proportions (%) of all identified bacterial strains from phylum to species level in each sample are shown in the table.

### **Supplementary Table 5. Relative abundance of all annotated KEGG orthologs in study cohort fecal DNA**

The abundance ratio of all annotated KEGG orthologs in each sample are shown in the table.

### **Supplementary Table 6. Significantly enriched KEGG orthologs in HBP group**

The major part of significantly enriched KEGG orthologs and some of the nearly significant enriched orthologs in HBP group are shown in the table. The relative abundance of each ortholog is shown as

mean  $\pm$  standard deviation. P value was evaluated by two-tailed Mann-Whitney test. Ctrl, healthy control group. HBP, hypertension patient group. Mean, average abundance. SD, standard deviation.

**Supplementary Table 7. Relative abundance of all annotated KEGG pathways in study cohort fecal DNA**

The abundance ratio of all annotated KEGG pathways in each sample are shown in the table.

**Supplementary Table 8. Relative abundance of all annotated KEGG modules in study cohort fecal DNA**

The abundance ratio of all annotated KEGG modules in each sample are shown in the table.

**Supplementary Table 9. Hub genes related to glycan biosynthesis, and their abundances in study cohort fecal DNA**

The major hub genes related to glycan biosynthesis were identified based on KEGG and Genecards databases, and their KEGG orthologs and KO ID are shown in the table. Only 5 of the hub genes were identified in the cohort fecal DNA, and their abundant differences between healthy control (Ctrl) and hypertension patients (HBP) were evaluated by two-tailed Mann-Whitney test. Mean, average abundance. SD, standard deviation.

**Supplementary Table 10. Identified metabolites in study cohort fecal samples**

Compounds in cohort fecal samples detected by LC-MS with VIP>1 were assigned to metabolites in HMDB, and then assigned to KEGG metabolomics pathways. The related information of these compounds is shown in the table. VIP, variable important in projection. FC, fold change of HBP group value to control group value. P value is evaluated by two-tailed Welch's t-test based on compounds peak intensities differences between control group and HBP group.

**Supplementary Table 11. Identified metabolites in study cohort plasma samples**

Compounds in cohort plasma samples were also detected and analysis as compounds in fecal samples, and results are shown in this table. The meanings of VIP, FC, and p value are the same as in Supplementary Table 10.

**Supplementary Table 12. Sequencing data production of mice fecal samples**

The meanings of Raw data, clean data, Scaftigs, total length, and N50 length are the same as in Supplementary Table S3. AW, AMPK $\alpha$ 1<sup>fl/fl</sup>/WT mice. AK, AMPK $\alpha$ 1<sup>fl/fl</sup>/Csf1r-MerCre mice. AW/AK-A, before Angiotensin II perfusion (after tamoxifen intraperitoneal for 5 days). AW/AK-B, after Angiotensin II perfusion for 7 days.

**Supplementary Table 13. Relative abundance of all identified bacterial taxonomies in mice fecal DNA**

The abundance proportions (%) of all identified bacterial strains from phylum to species level in each mouse fecal sample are shown in the table. The meanings of AW/AK-A/B are the same as in Supplementary Table 12.

**Supplementary Table 14. Relative abundance of all annotated KEGG orthologs in mice fecal DNA**

The abundance ratio of all annotated KEGG orthologs in each mouse sample are shown in the table. The meanings of AW/AK-A/B are the same as in Supplementary Table 12.

## **Supplementary Table 15. Relative abundance of all annotated KEGG pathways in mice fecal DNA**

The abundance ratio of all annotated KEGG pathways in each mouse fecal sample are shown in the table. The meanings of AW/AK-A/B are the same as in Supplementary Table 12.

## **Supplementary Table 16. Spearman correlation test of physiological parameters with some gut microbiome components**

The spearman correlation coefficient values (r) and statistical significance (p) are shown in the table. Listed gut microbiome components are greatly changed bacterial strains, orthologs, pathways, and module which are shown in Figure 2 and Figure 5. Components labeled in red color are increased in HBP group, and components labeled in blue color are decreased in HBP group.  $p < 0.05$  is considered as statistically significant difference, and labeled yellow color and “\*”.

## **5 Supplementary References**

- Chen, L., Peng, J., Wang, Y., Jiang, H., Wang, W., Dai, J., et al. (2020). Fenofibrate-induced mitochondrial dysfunction and metabolic reprogramming reversal: the anti-tumor effects in gastric carcinoma cells mediated by the PPAR pathway. *Am J Transl Res.* **12**, 428-446
- Dai, X., Zeng, J., Yan, X., Lin, Q., Wang, K., Chen, J., et al. (2018). Sitagliptin-mediated preservation of endothelial progenitor cell function via augmenting autophagy enhances ischaemic angiogenesis in diabetes. *J Cell Mol Med.* **22**, 89-100. <https://doi.org/10.1111/jcmm.13296>
- De Ciuzeis, C., Amiri, F., Brassard, P., Endemann, D. H., Touyz, R. M., Schiffrin, E. L. (2005). Reduced vascular remodeling, endothelial dysfunction, and oxidative stress in resistance arteries of angiotensin II-infused macrophage colony-stimulating factor-deficient mice: evidence for a role in inflammation in angiotensin-induced vascular injury. *Arterioscler Thromb Vasc Biol.* **25**, 2106-2113. <https://doi.org/10.1161/01.ATV.0000181743.28028.57>
- Duca, F. A., Cote, C. D., Rasmussen, B. A., Zadeh-Tahmasebi, M., Rutter, G. A., Filippi, B. M., et al. (2015). Metformin activates a duodenal Ampk-dependent pathway to lower hepatic glucose production in rats. *Nat Med.* **21**, 506-511. <https://doi.org/10.1038/nm.3787>
- Earley, A. M., Graves, C. L., Shiau, C. E. (2018). Critical Role for a Subset of Intestinal Macrophages in Shaping Gut Microbiota in Adult Zebrafish. *Cell Rep.* **25**, 424-436. <https://doi.org/10.1016/j.celrep.2018.09.025>
- Gu, J., Yang, M., Qi, N., Mei, S., Chen, J., Song, S., et al. (2016). Olmesartan Prevents Microalbuminuria in db/db Diabetic Mice Through Inhibition of Angiotensin II/p38/SIRT1-Induced Podocyte Apoptosis. *Kidney Blood Press Res.* **41**, 848-864. <https://doi.org/10.1159/000452588>

- Ha, Y. M., Park, E. J., Kang, Y. J., Park, S. W., Kim, H. J., Chang, K. C. (2014). Valsartan independent of AT(1) receptor inhibits tissue factor, TLR-2 and -4 expression by regulation of Egr-1 through activation of AMPK in diabetic conditions. *J Cell Mol Med.* **18**, 2031-2043. <https://doi.org/10.1111/jcmm.12354>
- He, J., Ding, J., Lai, Q., Wang, X., Li, A., Liu, S. (2019). Irbesartan Ameliorates Lipid Deposition by Enhancing Autophagy via PKC/AMPK/ULK1 Axis in Free Fatty Acid Induced Hepatocytes. *Front Physiol.* **10**, 681. <https://doi.org/10.3389/fphys.2019.00681>
- Hernandez, J. S., Barreto-Torres, G., Kuznetsov, A. V., Khuchua, Z., Javadov, S. (2014). Crosstalk between AMPK activation and angiotensin II-induced hypertrophy in cardiomyocytes: the role of mitochondria. *J Cell Mol Med.* **18**, 709-720. <https://doi.org/10.1111/jcmm.12220>
- Hong, O. K., Choi, Y. H., Kwon, H. S., Jeong, H. K., Son, J. W., Lee, S. S., et al. (2018). Long-term insulin treatment leads to a change in myosin heavy chain fiber distribution in OLETF rat skeletal muscle. *J Cell Biochem.* <https://doi.org/10.1002/jcb.27571>
- Hu, H., Li, X., Ren, D., Tan, Y., Chen, J., Yang, L., et al. (2019). The cardioprotective effects of carvedilol on ischemia and reperfusion injury by AMPK signaling pathway. *Biomed Pharmacother.* **117**, 109106. <https://doi.org/10.1016/j.biopha.2019.109106>
- Huang, Z., Fang, W., Liu, W., Wang, L., Liu, B., Liu, S., et al. (2018). Aspirin induces Beclin-1-dependent autophagy of human hepatocellular carcinoma cell. *Eur J Pharmacol.* **823**, 58-64. <https://doi.org/10.1016/j.ejphar.2018.01.031>
- Hwang, H. Y., Shim, J. S., Kim, D., Kwon, H. J. (2020). Antidepressant drug sertraline modulates AMPK-MTOR signaling-mediated autophagy via targeting mitochondrial VDAC1 protein. *Autophagy*, 1-17. <https://doi.org/10.1080/15548627.2020.1841953>
- Hwang, Y. J., Cho, D. H. (2020). Activation of AMPK/proteasome/MLCK degradation signaling axis by telmisartan inhibits VSMC contractility and vessel contraction. *Biochem Biophys Res Commun.* **524**, 853-860. <https://doi.org/10.1016/j.bbrc.2020.02.007>
- Ishizaka, N., Hongo, M., Matsuzaki, G., Furuta, K., Saito, K., Sakurai, R., et al. (2010). Effects of the AT(1) receptor blocker losartan and the calcium channel blocker benidipine on the accumulation of lipids in the kidney of a rat model of metabolic syndrome. *Hypertens Res.* **33**, 263-268. <https://doi.org/10.1038/hr.2009.224>
- Kang, S. Y., Lee, S. B., Kim, H. J., Kim, H. T., Yang, H. O., Jang, W. (2017). Autophagic modulation by rosuvastatin prevents rotenone-induced neurotoxicity in an in vitro model of Parkinson's disease. *Neurosci Lett.* **642**, 20-26. <https://doi.org/10.1016/j.neulet.2017.01.063>
- Kim, H., Baek, C. H., Chang, J. W., Yang, W. S., Lee, S. K. (2020). Febuxostat, a novel inhibitor of xanthine oxidase, reduces ER stress through upregulation of SIRT1-AMPK-HO-1/thioredoxin expression. *Clin Exp Nephrol.* **24**, 205-215. <https://doi.org/10.1007/s10157-019-01804-8>
- Knake, C., Stamp, L., Bahn, A. (2014). Molecular mechanism of an adverse drug-drug interaction of allopurinol and furosemide in gout treatment. *Biochem Biophys Res Commun.* **452**, 157-162. <https://doi.org/10.1016/j.bbrc.2014.08.068>
- Lee, Y. J., Choi, S. Y., Yang, J. H. (2016). AMP-activated protein kinase is involved in perfluorohexanesulfonate-induced apoptosis of neuronal cells. *Chemosphere.* **149**, 1-7. <https://doi.org/10.1016/j.chemosphere.2016.01.073>

- Lee, Y. S., Park, J. S., Lee, D. H., Han, J., Bae, S. H. (2020). Ezetimibe ameliorates lipid accumulation during adipogenesis by regulating the AMPK-mTORC1 pathway. *FASEB J.* **34**, 898-911. <https://doi.org/10.1096/fj.201901569R>
- Li, H., Liu, B., Song, J., An, Z., Zeng, X., Li, J., et al. (2019). Characteristics of Gut Microbiota in Patients with Hypertension and/or Hyperlipidemia: A Cross-Sectional Study on Rural Residents in Xinxiang County, Henan Province. *Microorganisms.* **7**, 1-13. <https://doi.org/10.3390/microorganisms7100399>
- Lin, Y. C., Wang, J. C., Wu, M. S., Lin, Y. F., Chen, C. R., Chen, C. Y., et al. (2020). Nifedipine Exacerbates Lipogenesis in the Kidney via KIM-1, CD36, and SREBP Upregulation: Implications from an Animal Model for Human Study. *Int J Mol Sci.* **21**. <https://doi.org/10.3390/ijms21124359>
- Mao, K., Baptista, A. P., Tamoutounour, S., Zhuang, L., Bouladoux, N., Martins, A. J., et al. (2018). Innate and adaptive lymphocytes sequentially shape the gut microbiota and lipid metabolism. *Nature.* **554**, 255-259. <https://doi.org/10.1038/nature25437>
- Marques, M. B., Ribeiro-Oliveira, A., Jr., Guimaraes, J., Nascimento, G. F., Anjos, A. P., Vilas-Boas, W. W., et al. (2012). Modifications in basal and stress-induced hypothalamic AMP-activated protein kinase (AMPK) activity in rats chronically treated with an angiotensin II receptor blocker. *Stress.* **15**, 554-561. <https://doi.org/10.3109/10253890.2011.648673>
- Ohira, M., Endo, K., Saiki, A., Miyashita, Y., Terai, K., Murano, T., et al. (2012). Atorvastatin and pitavastatin enhance lipoprotein lipase production in L6 skeletal muscle cells through activation of adenosine monophosphate-activated protein kinase. *Metabolism.* **61**, 1452-1460. <https://doi.org/10.1016/j.metabol.2012.03.010>
- Sag, D., Carling, D., Stout, R. D., Suttles, J. (2008). Adenosine 5'-monophosphate-activated protein kinase promotes macrophage polarization to an anti-inflammatory functional phenotype. *J Immunol.* **181**, 8633-8641. <https://doi.org/10.4049/jimmunol.181.12.8633>
- Suarez-Martinez, E., Husain, K., Ferder, L. (2014). Adiponectin expression and the cardioprotective role of the vitamin D receptor activator paricalcitol and the angiotensin converting enzyme inhibitor enalapril in ApoE-deficient mice. *Ther Adv Cardiovasc Dis.* **8**, 224-236. <https://doi.org/10.1177/1753944714542593>
- Sun, L., Yan, S., Wang, X., Zhao, S., Li, H., Wang, Y., et al. (2017). Metoprolol prevents chronic obstructive sleep apnea-induced atrial fibrillation by inhibiting structural, sympathetic nervous and metabolic remodeling of the atria. *Sci Rep.* **7**, 14941. <https://doi.org/10.1038/s41598-017-14960-2>
- Sun, Y., Peng, X., Li, Y., Ma, H., Li, D., Shi, X. (2019). The effects of histamine H1 type receptor (H1R) in regulating osteoblastic cell differentiation and mineralization. *Artif Cells Nanomed Biotechnol.* **47**, 1281-1287. <https://doi.org/10.1080/21691401.2019.1596924>
- Sung, J. Y., Choi, H. C. (2012). Nifedipine inhibits vascular smooth muscle cell proliferation and reactive oxygen species production through AMP-activated protein kinase signaling pathway. *Vascul Pharmacol.* **56**, 1-8. <https://doi.org/10.1016/j.vph.2011.06.001>
- Tieu, B. C., Lee, C., Sun, H., Lejeune, W., Recinos, A., 3rd, Ju, X., et al. (2009). An adventitial IL-6/MCP1 amplification loop accelerates macrophage-mediated vascular inflammation leading to aortic dissection in mice. *J Clin Invest.* **119**, 3637-3651. <https://doi.org/10.1172/JCI38308>
- Yang, H., Zhao, P., Tian, S. (2016). Clopidogrel Protects Endothelium by Hindering TNFalpha-Induced VCAM-1 Expression through CaMKKbeta/AMPK/Nrf2 Pathway. *J Diabetes Res.* **2016**, 9128050. <https://doi.org/10.1155/2016/9128050>
